# Supplementary material for: Individual Prognosis of Symptom Burden and Functioning in Chronic Diseases: A Generic Method Based on Patient-Reported Outcome (PRO) Measures
Source: PubMed Central journal article supplement (PMC5558046; doi:10.2196/jmir.8111), 2017-08-01
Supplement: jmir_v19i8e278_app2.pdf [file jmir_v19i8e278_app2.pdf]

### Number of days after the stroke

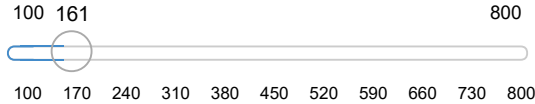

### Cohort

all  matched (+/- MCID)

### HADS-D score

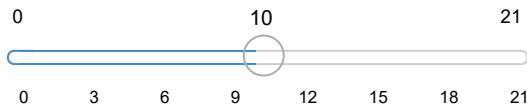

### Match criterium (MCID)

0.5 SD  1.0 SEM  as defined

### Time-axis cut-off

no  yes

### Lowess smoother

no  f=2/3  f=1/3  f=1/6

### Restrict on gender

no  female  male

### Restrict to habitual responders

- no
- >5 questionnaires
- >4 questionnaires
- >3 questionnaires

### Restrict to donors surviving 48 mths

no  yes

Options below are experimental:

Courses of HADS-D score in donor cohort

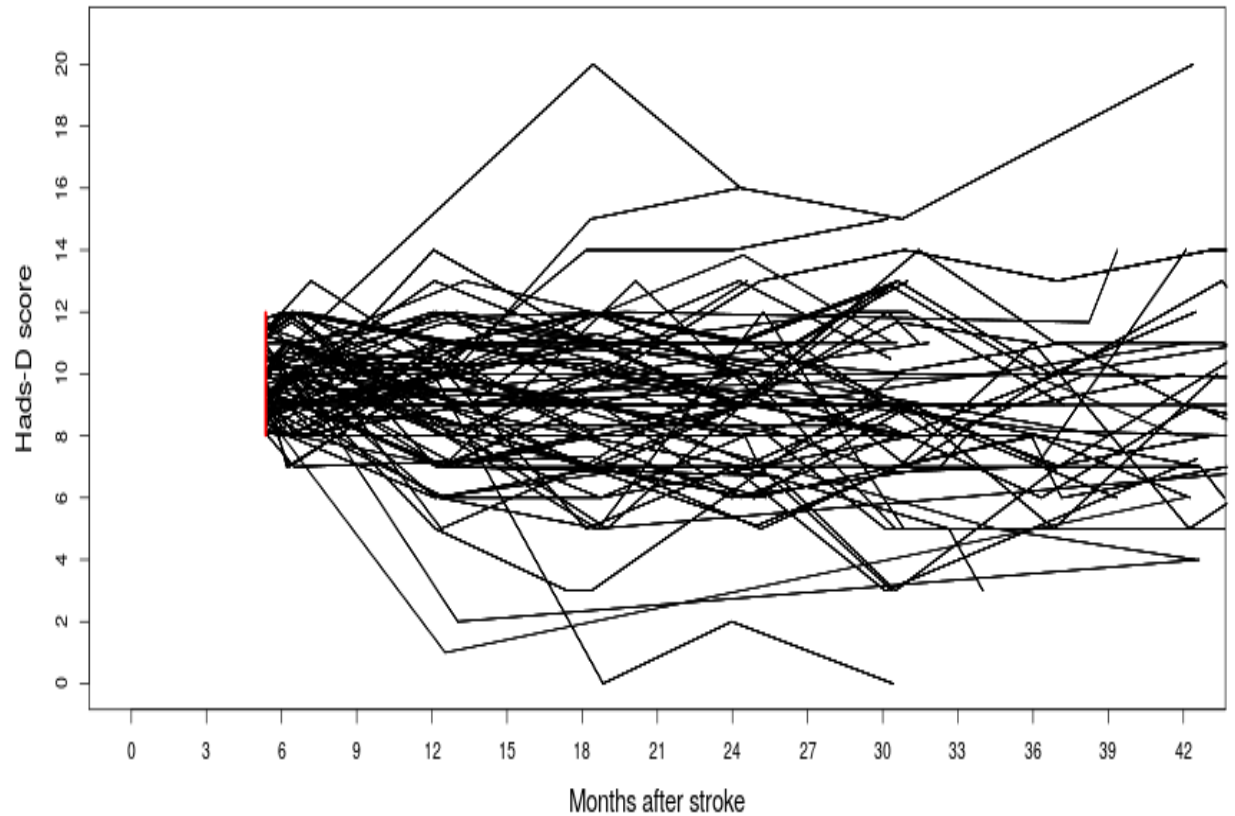

**Descriptive statistics** Match day:161 days post stroke, match score:10 (8.03-11.97)

|              | Patients  | Measurements | Median [IQR] | Mean (SD)   | Median intra-id SD [IQR] |
|--------------|-----------|--------------|--------------|-------------|--------------------------|
| Donor cohort | 83 (5.9%) | 494 (6.8%)   | 9.3 [3]      | 9.32 (2.4)  | 1.37 [1.07]              |
| Base cohort  | 1405      | 7278         | 4 [6]        | 4.64 (3.89) | 1.41 [1.29]              |

**Donor cohort scores by time categories** In this table only the first measurements in each time category is used.

| Months from today (match day)<br>(161 days after stroke) | 6<br>mths | 12<br>mths | 18<br>mths | 24<br>mths | 30<br>mths | 36<br>mths | 42<br>mths |
|----------------------------------------------------------|-----------|------------|------------|------------|------------|------------|------------|
| Patients (n)                                             | 70        | 68         | 67         | 53         | 29         | 27         | 11         |

### Suppress plot of unstable donors

no  >16  >8

### Restricted dataset (Table 2)

no  yes

### Use regression estimates from restricted dataset

no  yes

### HADS-D score Outcome variable

genuine HADS-D scores only  
 genuine HADS-D scores supplemented with intra-id regression

### Use fixed time intervals

no  yes

### Index day score by interpolation

no  yes

### Donor cohort scores by time categories In this table only the first measurements in each time category is used.

| Difference (ref:match day score) |      |      |      |      |      |      |      |
|----------------------------------|------|------|------|------|------|------|------|
| - Improved (%)                   | 27.1 | 26.5 | 28.4 | 30.2 | 34.5 | 44.4 | 27.3 |
| - Stable (%)                     | 62.9 | 63.2 | 56.7 | 56.6 | 58.6 | 33.3 | 63.6 |
| - Worse (%)                      | 10   | 10.3 | 14.9 | 13.2 | 6.9  | 22.2 | 9.1  |
| Difference (ref:preceding score) |      |      |      |      |      |      |      |
| - Improved (%)                   | 27.1 | 19.6 | 23.2 | 27.7 | 38.1 | 27.8 | 33.3 |
| - Stable (%)                     | 62.9 | 60.7 | 57.1 | 42.6 | 38.1 | 38.9 | 50   |
| - Worse (%)                      | 10   | 19.6 | 19.6 | 29.8 | 23.8 | 33.3 | 16.7 |
| Cumulative experiences           |      |      |      |      |      |      |      |
| - No change (%)                  | 62.9 | 51.5 | 32.8 | 22.6 | 20.7 | 7.4  | 9.1  |
| - Changes (%)                    | 37.1 | 48.5 | 67.2 | 77.4 | 79.3 | 92.6 | 90.9 |
| - - Improvements (%)             | 27.1 | 32.4 | 43.3 | 52.8 | 58.6 | 66.7 | 36.4 |
| - - Worsenings (%)               | 10   | 17.6 | 26.9 | 28.3 | 20.7 | 29.6 | 54.5 |

### Individualized prognostic statements:

*The prognosis for your depressive symptoms is based on how previous patients fared who at the same time after their stroke as you (5.4 months) had similar depressive symptoms (HADS-D score: 10).*

*Six months later (11.4 months after the stroke) 10 % of the patients had worse depressive symptoms, 27.1 % had fewer symptoms while 62.9 % had symptoms like you have now. One year later (17.4 months after the stroke) 10.3 % of the patients had worse depressive symptoms, 26.5 % had fewer symptoms while 63.2 % had symptoms like you have now.*

*Notice that the courses of depressive symptoms are very variable. Over a 2-year period, 77.4 % of patients like you reported changed depressive symptoms (better or worse) in at least one questionnaire and over the course of 3 years it was 92.6 %*

*Like the weather forecast, the prognosis becomes more uncertain the longer we look forward, for example several years. You can at anytime revisit this page to obtain a new and more reliable short-term prognosis.*
